# Supplementary material for: Effect of Electrolytic Manganese Residue in Fly Ash-Based Cementitious Material: Hydration Behavior and Microstructure
Source: MDPI journal article supplement (doi:10.3390/ma14227047), 2021-11-20
Supplement: s1 [file s1]

Supplementary material

# Effect of Electrolytic Manganese Residue in Fly Ash-Based Cementitious Material: Hydration Behavior and Microstructure

Yaguang Wang <sup>1</sup>, Na Zhang <sup>2,\*</sup>, Yongyu Ren <sup>1</sup>, Yingtang Xu <sup>1</sup> and Xiaoming Liu <sup>1,\*</sup>

<sup>1</sup> State Key Laboratory of Advanced Metallurgy, School of Metallurgical and Ecological Engineering, University of Science and Technology Beijing, Beijing 100083, China; wangyg@xs.ustb.edu.cn (Y.W.); ren142517@163.com (Y.R.); yingtangxu@163.com (Y.X.)

<sup>2</sup> Beijing Key Laboratory of Materials Utilization of Nonmetallic Minerals and Solid Wastes, National Laboratory of Mineral Materials, School of Materials Science and Technology, China University of Geosciences, Beijing 100083, China

\* Correspondence: nazhang@cugb.edu.cn (N.Z.); liuxm@ustb.edu.cn (X.L.)

**Citation:** Wang, Y.; Zhang, N.; Ren, Y.; Xu, Y.; Liu, X. Effect of Electrolytic Manganese Residue in Fly Ash-Based Cementitious Material: Hydration Behavior and Microstructure. *Materials* **2021**, *14*, 7047. <https://doi.org/10.3390/ma14227047>

Academic Editors: Alex Kondratiev, Dmitry Valeev and Neven Ukrainczyk

Received: 30 August 2021

Accepted: 16 November 2021

Published: 20 November 2021

**Publisher's Note:** MDPI stays neutral with regard to jurisdictional claims in published maps and institutional affiliations.

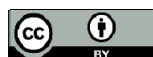

**Copyright:** © 2021 by the authors. Licensee MDPI, Basel, Switzerland. This article is an open access article distributed under the terms and conditions of the Creative Commons Attribution (CC BY) license (<http://creativecommons.org/licenses/by/4.0/>).

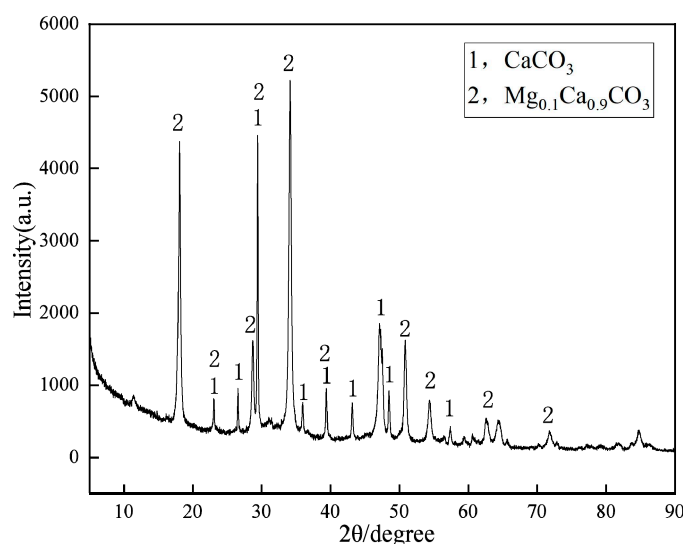

**Figure S1.** XRD pattern of calcium carbide slag.

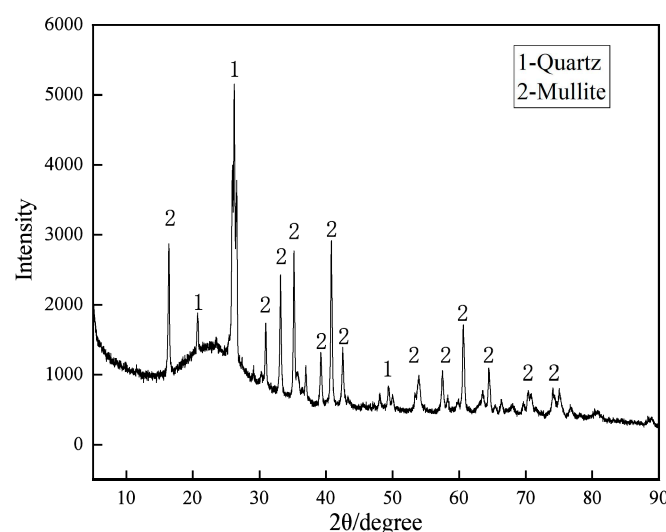

**Figure S2.** XRD pattern of fly ash.
